# Supplementary material
Source: Research Square preprint supplement (doi:10.21203/rs.3.rs-10072397/v1)
Supplement: Supplementary file 1 [file 0875760d74cf3447b3f4bed9.docx]

Dear Student!

I am a Physical Education and Physiotherapy teacher, assistant professor of Eszterhazy Karoly Catholic University. I am researching health-behavior and body assessment, and posture control of adolescents.

Please read the questions and answer them properly! Check one answer by each question! Thank you for your cooperation in advance!

Barbara Bácskay-Abonyi

1. Participant code:
2. Date of birth:
3. Gender:
4. Class code:
5. Extracurricular physical activity more frequent in the last seven weeks?

a; Yes, ……………………………………………………………….

b; No

1. Participation in prescribed posture training

a; Yes

b; No

1. During the program, did you consciously monitor or check your posture during the day

a; Yes

b; No

8. How much did you find this program useful?

a; Absolutely.

b; I do/did not find it useful at all.

1. Has this program made changes on your body posture?

a; Yes……………………………………………………………………………….

b; No
